# Supplementary material
Source: ML conference proceedings conference paper supplement (https://openreview.net/forum?id=JsnR0YO4Fq)
Supplement: supplementary_material [file attachment]

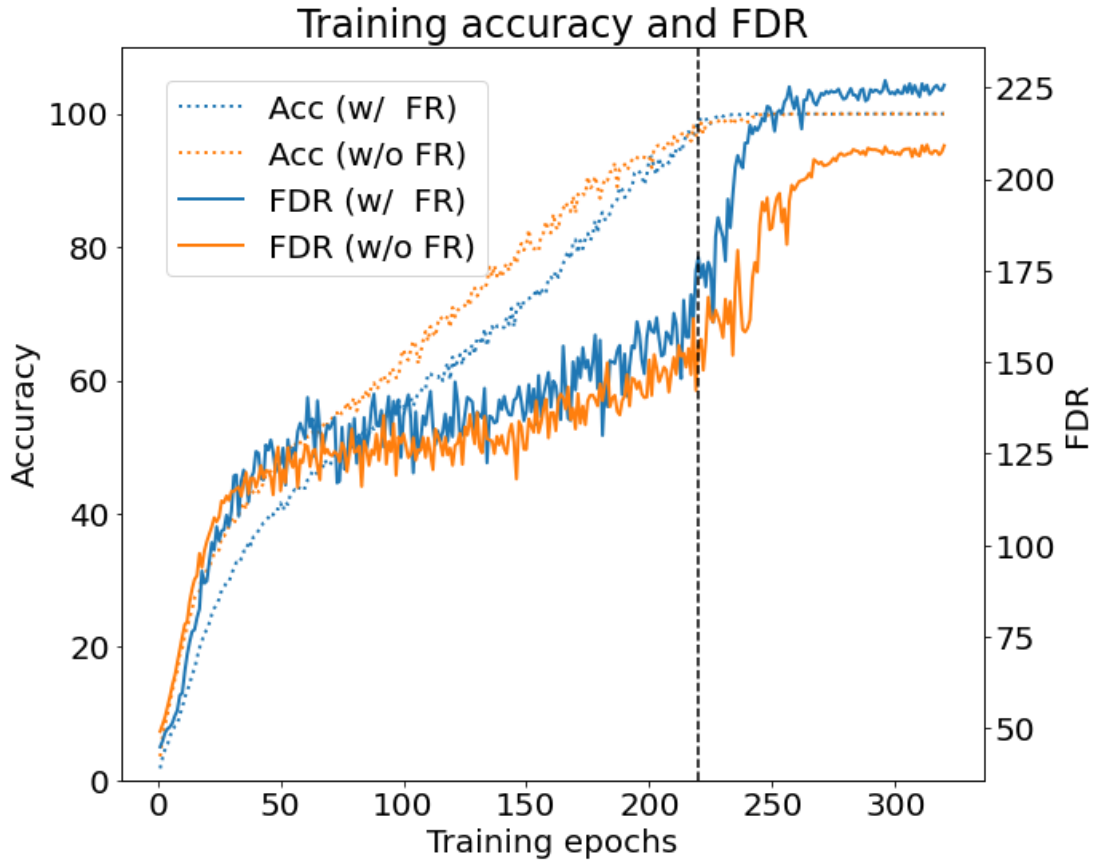

Figure 1: Relationship between number of training epochs, training accuracy, and FDR for CIFAR100-LT. "w/ FR" and "w/o FR" represent WD&ETF&FR and WD&ETF, respectively. The difference in FDR between training with FR and without FR increases significantly after the training error reaches almost 0%.
